# Supplementary material for: The first quaternary diamond-like semiconductor with 10-membered LiS4rings exhibiting excellent nonlinear optical performances
Source: Royal Society of Chemistry journal article supplement (doi:10.1039/c6cc09565h), 2017-01-01
Supplement: c6cc09565h1.pdf [file c6cc09565h1.pdf]

## Electronic Supplementary Information

### **A first quaternary diamond-like semiconductor with 10-membered LiS<sub>4</sub> rings exhibiting excellent nonlinear optical performances**

Kui Wu, Zhihua Yang, Shilie Pan\*

*Key Laboratory of Functional Materials and Devices for Special Environments of  
CAS; Xinjiang Key Laboratory of Electronic Information Materials and Devices;  
Xinjiang Technical Institute of Physics & Chemistry of CAS, 40-1 South Beijing Road,  
Urumqi 830011, China*

*To whom correspondence should be addressed :*

*E-mail: [slpan@ms.xjb.ac.cn](mailto:slpan@ms.xjb.ac.cn) (Shilie Pan).*

## CONTENTS

- 1. Synthesis of Title Compounds**
- 2. Structural Refinement and Crystal Data**
- 3. Property Characterization**
- 4. Figures and Tables**
- 5. References**

## 1. Synthesis of Title Compounds

All the starting materials were used as purchased without further purification. In the preparation process, a graphite crucible was added into the vacuum sealed silica tube to avoid the reaction between metal Li and silica tube at the high temperature. Initially, we attempted to prepare the  $\text{Li}_2\text{HgGeS}_4$  with the ratio of  $\text{Li}:\text{HgS}:\text{Ge}:\text{S} = 2:1:1:3$  at the reaction temperature of  $700\text{ }^\circ\text{C}$ . However, after washed by the N, N-dimethylformamide (DMF) solvent and measured under the single crystal X-ray diffraction test, two new compounds  $\text{Li}_4\text{HgGe}_2\text{S}_7$  (main product,  $\sim 80\%$ , yellow) and  $\text{Li}_{1.8}\text{Hg}_{1.1}\text{GeS}_4$  (a small amount,  $\sim 20\%$ , reddish) were interestingly obtained. To further improve the pure phase of  $\text{Li}_4\text{HgGe}_2\text{S}_7$ , other ratio of reactants and reaction temperatures were used, but only the crystals of  $\text{Li}_{1.8}\text{Hg}_{1.1}\text{GeS}_4$  were obtained. Thus, to complete the following measurement of  $\text{Li}_4\text{HgGe}_2\text{S}_7$ , its measured sample was obtained by roughly hand-picked. Note that this material is stable in air over half one year.

Powder X-ray diffraction (XRD) analysis was measured on a Bruker D2 X-ray diffractometer with Cu  $K\alpha$  radiation ( $\lambda = 1.5418\text{ \AA}$ ) at room temperature. The  $2\theta$  range was  $10\text{--}70^\circ$  with a step size of  $0.02^\circ$  and a fixed counting time of 1s/step.

## 2. Structural Refinement and Crystal Data

High quality single-crystal of  $\text{Li}_4\text{HgGe}_2\text{S}_7$  was carefully picked and used for data collection with a Bruker SMART APEX II 4K CCD diffractometer using Mo  $K\alpha$  radiation ( $\lambda = 0.71073 \text{ \AA}$ ) at 296 K. Its structure was solved by direct method and refined using the SHELXTL program package.<sup>1</sup> Multi-scan method was used for absorption correction.<sup>2</sup> Rational anisotropic thermal parameters for all atoms were obtained by the anisotropic refinement and extinction correction. PLATON was also used to check the final structure and no other symmetries were found. Result of single-crystal refinement was given the rational formula “ $\text{Li}_4\text{HgGe}_2\text{S}_7$ ”. Detail refinement parameters and data were shown in Table S1, the atomic coordinates, isotropic displacement parameters and bond valence sums (BVS) were shown in Table S2.

### **3. Property Characterization**

#### **UV–vis–Near IR Diffuse-Reflectance and IR Spectroscopy**

Diffuse-reflectance spectrum was tested by a Shimadzu SolidSpec-3700DUV spectrophotometer in the wavelength range of 190–2600 nm at room temperature. IR spectra were collected with a Shimadzu IR Affinity-1 Fourier transform infrared spectrometer in wavenumber range from 400 to 4000  $\text{cm}^{-1}$  using picked single-crystals mixed with KBr pellets.

#### **Raman Spectroscopy**

Hand-picked crystals were firstly put on an object slide, and then a LABRAM HR Evolution spectrometer equipped with a CCD detector by a 532 nm laser was used to record the Raman spectra. The integration time was set to be 10 s.

#### **Thermal Analysis**

The thermal analysis was measured on a simultaneous NETZSCH STA 449C thermal analyzer instrument. The crushed crystals were placed in  $\text{Al}_2\text{O}_3$  crucible, and the temperature was raised from 40 to 1000  $^{\circ}\text{C}$  at 10  $^{\circ}\text{C}/\text{min}$  under  $\text{N}_2$  atmosphere.

#### **Second-harmonic Generation Measurement**

Measured sample was obtained by roughly hand-picked. Unfortunately, we have not prepared the enough sample to complete the phase-matching measurement. Future growth of large-size crystals for  $\text{Li}_4\text{HgGe}_2\text{S}_7$  and further relative test evaluation are in progress. By means of the Kurtz and Perry method, powder SHG responses were investigated by a Q-switch laser (2.09  $\mu\text{m}$ , 3 Hz, 50 ns) with ground micro-crystals at 200–250  $\mu\text{m}$  particle size.  $\text{AgGaS}_2$  single-crystal was also ground and sieved into the same size range as the reference. SHG signal was detected by a digital oscilloscope.

#### **LDT Measurement**

Ground micro-crystals sample was used to evaluate the LDT under a pulsed YAG laser (1.06  $\mu\text{m}$ , 10 ns, 10 Hz). Similar sizes of  $\text{AgGaS}_2$  crystal are chosen as the reference. By adjusting the laser output energy, colour change of the test sample was carefully observed by an optical microscope to determine the LDT.

### **Theoretical Calculations.**

With the plane wave pseudopotential method, the electronic structure of  $\text{Li}_4\text{HgGe}_2\text{S}_7$  was performed on density functional theory (DFT).<sup>3</sup> The Perdew-Burke-Ernzerhof (PBE) of Generalized Gradient Approximation (GGA)<sup>4</sup> and the normconserving pseudopotential (NCP) were chosen.<sup>5,6</sup> Kinetic energy cut-offs was set to be 720.0 eV and Monkhorst-Pack  $k$ -point meshes ( $5 \times 5 \times 3$ ) with a density of  $0.03 \text{ \AA}^{-3}$  in the Brillouin zone (BZ) was adopted. The orbital electrons were treated as valence electrons as follows, Li  $2s^1$ , S  $3s^2 3p^4$ , Ge  $4s^2 4p^2$ , Hg  $5d^{10} 6s^2$ . Other important parameters, such as NLO coefficient and birefringence, were also calculated based on the scissors operators.<sup>7</sup>

#### 4. Figures and Tables

**Fig. S1** TG and DSC curves for  $\text{Li}_4\text{HgGe}_2\text{S}_7$ .

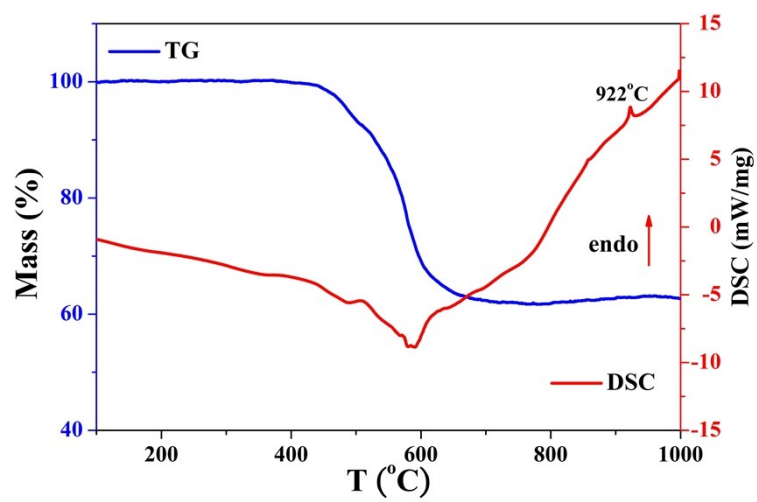

**Fig. S2** Raman spectrum of  $\text{Li}_4\text{HgGe}_2\text{S}_7$ .

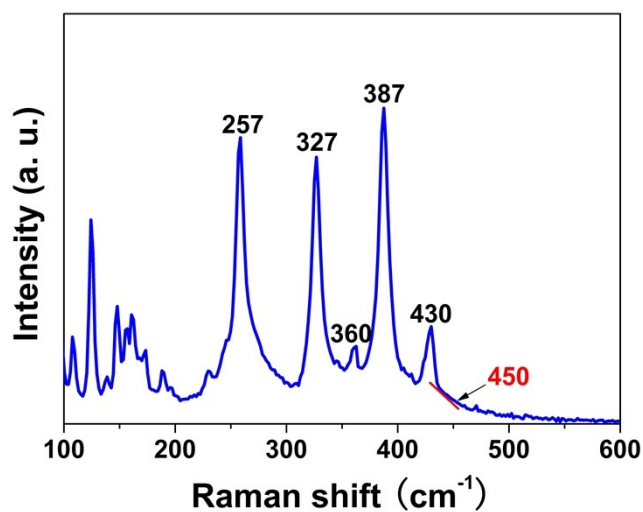

Raman spectrum displays strong absorption bands at 430, 387, 360, and 327  $\text{cm}^{-1}$  attributed to the characteristic absorptions of Ge-S mode. The bands at around 257  $\text{cm}^{-1}$  are attributed to Hg-S bonding interaction, which are also similar to those of other related metal sulfides. Other bands below the 200  $\text{cm}^{-1}$  can be attributed to the characteristic absorptions of Li-S mode.

**Fig. S3.** (a) Band structure and (b) Projected density of states (PDOS) of  $\text{Li}_4\text{HgGe}_2\text{S}_7$ .

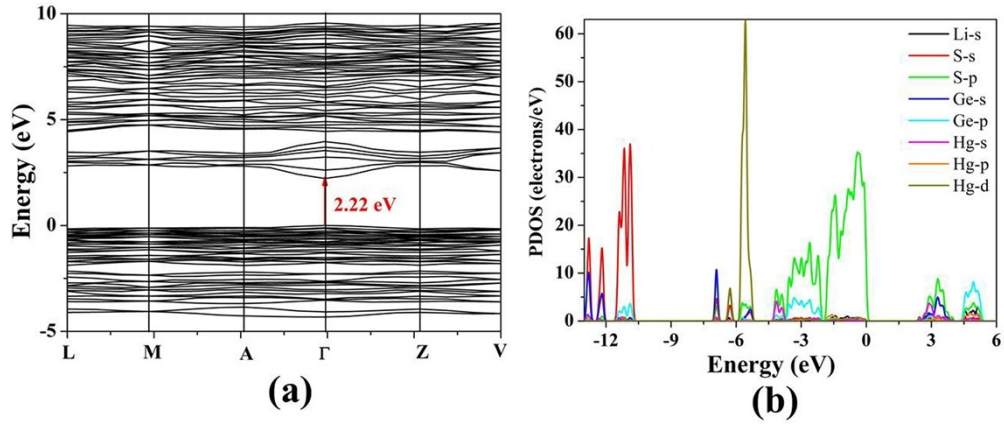



**Fig. S4.** SHG–density diagram of  $\text{Li}_4\text{HgGe}_2\text{S}_7$ . The rainbow represents the activities of the veocc state and veunocc state SHG.

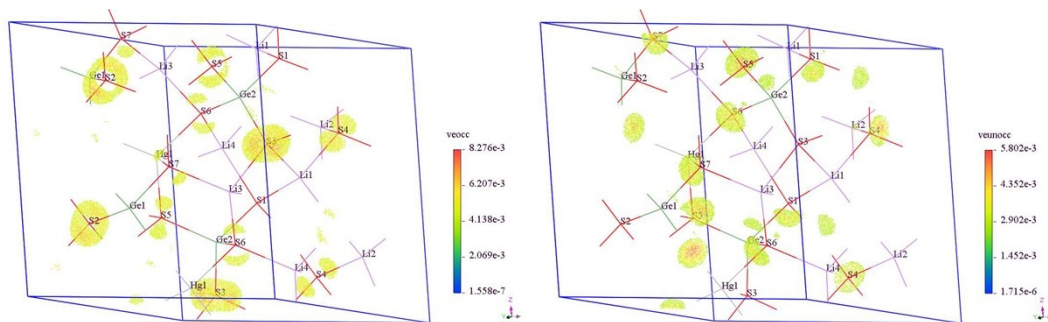

**Table S1** Comparison on the critical properties (bandgap and NLO coefficient) for several of ( $d^{10}$  elements and Mn)-containing metal sulfide DLSSs.

| Materials                                          | Bandgap (eV) | NLO coefficient (pm/V) | Ref.             |
|----------------------------------------------------|--------------|------------------------|------------------|
| <b>HgGa<sub>2</sub>S<sub>4</sub></b>               | <b>2.84</b>  | <b>31.5</b>            | 8, 9, 12         |
| CdGa <sub>2</sub> S <sub>4</sub>                   | 3.44         | 15.83                  | 10, 11, 12       |
| ZnGa <sub>2</sub> S <sub>4</sub>                   | 3.60         | 11.92                  | 10, 12           |
| Ag <sub>4</sub> CdGe <sub>2</sub> S <sub>7</sub>   | 2.45         | 14.51                  | 13, 12           |
| <b>Ag<sub>4</sub>HgGe<sub>2</sub>S<sub>7</sub></b> | <b>2.11</b>  | <b>23.07</b>           | 13, 12           |
| Li <sub>2</sub> CdGeS <sub>4</sub>                 | 3.15         | 22.5                   | 14               |
| Li <sub>2</sub> MnGeS <sub>4</sub>                 | 3.07         | 6.6                    | 15               |
| <b>Li<sub>4</sub>HgGe<sub>2</sub>S<sub>7</sub></b> | <b>2.75</b>  | <b>19.5</b>            | <b>This work</b> |
| Li <sub>4</sub> CdGe <sub>2</sub> S <sub>7</sub>   | 4.23         | 4.29                   | 12               |

**Table S2** Structure refinement and crystal data for Li<sub>4</sub>HgGe<sub>2</sub>S<sub>7</sub>.

| Empirical formula                                                                        | Li <sub>4</sub> HgGe <sub>2</sub> S <sub>7</sub> |
|------------------------------------------------------------------------------------------|--------------------------------------------------|
| formula weight                                                                           | 597.95                                           |
| crystal system                                                                           | <i>Monoclinic</i>                                |
| space group                                                                              | <i>Cc</i>                                        |
| <i>a</i> (Å)                                                                             | 16.876(2)                                        |
| <i>b</i> (Å)                                                                             | 6.7764(8)                                        |
| <i>c</i> (Å)                                                                             | 10.1613(13)                                      |
|                                                                                          | $\beta = 93.360(7)$                              |
| <i>Z</i> , <i>V</i> (Å <sup>3</sup> )                                                    | 4, 1160.0(2)                                     |
| <i>D<sub>c</sub></i> (g/cm <sup>3</sup> )                                                | 3.424                                            |
| $\mu$ (mm <sup>-1</sup> )                                                                | 19.549                                           |
| Completeness to theta = 27.51                                                            | 99.9%                                            |
| GOF on <i>F</i> <sup>2</sup>                                                             | 0.876                                            |
| <i>R</i> <sub>1</sub> , <i>wR</i> <sub>2</sub> ( <i>I</i> > 2σ( <i>I</i> )) <sup>a</sup> | 0.0191, 0.0386                                   |
| <i>R</i> <sub>1</sub> , <i>wR</i> <sub>2</sub> (all data)                                | 0.0204, 0.0390                                   |
| absolute structure parameter                                                             | 0.007(5)                                         |
| extinction coefficient                                                                   | 0.00582(9)                                       |
| largest diff. peak and hole (e Å <sup>-3</sup> )                                         | 1.081, -0.665                                    |

$$^{[a]}R_1 = F_o - F_c / F_o \text{ and } wR_2 = [w (F_o^2 - F_c^2)^2 / wF_o^4]^{1/2} \text{ for } F_o^2 > 2\sigma(F_o^2)$$

**Table S3** Atomic coordinates, isotropic displacement parameters, bond valence sums and global instability index (GII) for Li<sub>4</sub>HgGe<sub>2</sub>S<sub>7</sub>.

| atom                 | <i>x</i> | <i>y</i>  | <i>z</i> | $\delta_{iso}$ | BVS <sup>16,17</sup> |
|----------------------|----------|-----------|----------|----------------|----------------------|
| Hg1                  | 3768(1)  | 1320(1)   | 5525(1)  | 24(1)          | 2.077                |
| Ge1                  | 7312(1)  | 3368(1)   | 3282(1)  | 12(1)          | 4.008                |
| Ge2                  | 5211(1)  | 1767(2)   | 2621(1)  | 12(1)          | 4.036                |
| S1                   | 6276(1)  | 1696(2)   | 4122(1)  | 14(1)          | 1.979                |
| S2                   | 6992(1)  | 6429(2)   | 2951(1)  | 16(1)          | 2.025                |
| S3                   | 5473(1)  | 3316(2)   | 839(1)   | 19(1)          | 2.103                |
| S4                   | 7655(1)  | 1686(2)   | 1548(1)  | 16(1)          | 2.059                |
| S5                   | 4224(1)  | 3260(2)   | 3539(2)  | 16(1)          | 2.028                |
| S6                   | 4930(1)  | -1377(2)  | 2232(2)  | 16(1)          | 2.083                |
| S7                   | 8257(1)  | 2949(2)   | 4865(1)  | 16(1)          | 2.143                |
| Li1                  | 6572(8)  | -1940(20) | 4851(13) | 16(2)          | 1.057                |
| Li2                  | 8025(11) | 1650(20)  | 7056(19) | 24(3)          | 1.086                |
| Li3                  | 4455(10) | 6790(19)  | 4055(18) | 17(2)          | 1.106                |
| Li4                  | 5919(11) | 6530(20)  | 1260(19) | 28(4)          | 1.044                |
| GII <sup>18-20</sup> |          |           |          |                | 0.073                |

In order to ensure the reasonability of crystal structures of these compounds, bond valence and Global Instability Index (GII) are systemically calculated (Table S2). The method of bond-valence parameters was used to calculate the bond valences of elements. The following equation is commonly used to calculate the bond valence ( $v_{ij}$ ):

$$V_i = \sum_j v_{ij} = \sum_j \exp\left(\frac{r' - r_{ij}}{B}\right)$$

Where  $r'$  is empirically determined bond valence parameter,  $r_{ij}$  is actual bond length, and  $B$  is commonly taken to be a universal constant equal to 0.37 Å. Calculated results (Li, 1.044–1.106; Hg, 2.077; Ge, 4.008–4.036; S, 1.979–2.143) indicate that all atoms are in reasonable oxidation states. In addition, GII can be derived from the bond valence concepts, which represent the tension of lattice parameters and always used to evaluate the rationality of structure. While the value of GII is less than 0.05 vu (valence unit), the tension of structure is not proper, whereas the value of GII is larger than 0.2 vu, its structure is not stable. Thus, the value of GII in a reliable structure should be limited at 0.05–0.2 in general. As for Li<sub>4</sub>HgGe<sub>2</sub>S<sub>7</sub>, calculated GII value is 0.073 vu, which illustrates that its crystal structure is reasonable.

**Table S4** LDTs of  $\text{Li}_4\text{HgGe}_2\text{S}_7$  and  $\text{AgGaS}_2$  (as the reference)

| compounds                            | damage energy (mJ) | spot diameter (mm) | LDT ( $\text{MW}/\text{cm}^2$ ) |
|--------------------------------------|--------------------|--------------------|---------------------------------|
| $\text{AgGaS}_2$                     | 0.58               | 0.5                | 29.6                            |
| $\text{Li}_4\text{HgGe}_2\text{S}_7$ | 2.04               | 0.5                | 104.0                           |

**Table S5** Calculative polyhedral dipole moments for  $\text{Li}_4\text{HgGe}_2\text{S}_7$ .

| Units             | $x$   | $y$  | $z$   | debye |
|-------------------|-------|------|-------|-------|
| HgS <sub>4</sub>  | 0.66  | 0.00 | 1.03  | 1.19  |
| Ge1S <sub>4</sub> | −1.16 | 0.00 | 10.55 | 10.69 |
| Ge2S <sub>4</sub> | −0.15 | 0.00 | 2.98  | 3.00  |
| Unit cell         | 4.33  | 0.00 | 17.08 | 17.38 |

## 5. References

- 1 G. M. Sheldrick, *SHELXTL*, version 6.14, Bruker Analytical X-ray Instruments, Inc. Madison, WI, 2008.
- 2 A. L. Spek, *J. Appl. Crystallogr.*, 2003, **36**, 7.
- 3 S. J. Clark, M. D. Segall, C. J. Pickard, P. J. Hasnip, M. J. Probert, K. Refson and M. C. Payne, *Z. Kristallogr.*, 2005, **220**, 567.
- 4 J. P. Perdew, K. Burke and M. Ernzerhof, *Phys. Rev. Lett.*, 1996, **77**, 3865.
- 5 A. M. Rappe, K. M. Rabe, E. Kaxiras and J. D. Joannopoulos, *Phys. Rev. B*, 1990, **41**, 1227.
- 6 J. S. Lin, A. Qteish, M. C. Payne and V. Heine, *Phys. Rev. B*, 1993, **47**, 4174.
- 7 R. W. Godby, M. Schluter and L. J. Sham, *Phys. Rev. B*, 1988, **37**, 10159.
- 8 V. Petrov, G. Marchev, A. Tyazhev, M. Beutler, V. Panyutin, M. Starikova, A. Esteban-Martin, V. Badikov, G. Shevyrdyaeva, D. Badikov, M. Reza, S. Sheina and A. Fintisova, *Opt. Eng.*, 2013, **52**, 117102.
- 9 N. Umemura, T. Mikami and K. Kato, *Opt. Commun.*, 2012, **285**, 1394.
- 10 X. S. Jiang and W. R. L. Lambrecht, *Phys. Rev. B*, 2004, **69**, 035201.
- 11 A. H. Reshak and S. A. Khan, *J. Alloys Compd.*, 2014, **595**, 125.
- 12 F. Liang, L. Kang, Z. S. Lin, Y. C. Wu and C. T. Chen, *Coord. Chem. Rev.*, 2017, **333**, 57.
- 13 L. D. Gulay, I. D. Olekseyuk and O. V. Parasyuk, *J. Alloys Compd.*, 2002, **340**, 157.
- 14 J. A. Brant, D. J. Clark, Y. S. Kim, J. I. Jang, J. H. Zhang and J. A. Aitken, *Chem. Mater.*, 2014, **26**, 3045.
- 15 J. A. Brant, D. J. Clark, Y. S. Kim, J. I. Jang, A. Weiland and J. A. Aitken, *Inorg. Chem.*, 2015, **4**, 2809.
- 16 N. E. Brese and M. O'Keeffe, *Acta Crystallogr. B*, 1991, **47**, 192.
- 17 I. D. Brown and D. Altermatt, *Acta Crystallogr. B*, 1985, **41**, 244.
- 18 I. D. Brown, *The Chemical Bond in Inorganic Chemistry: The Bond Valence Model*, 1st ed.; Oxford University Press: Oxford, UK, 2002.
- 19 C. Preiser, J. Losel, I. D. Brown, M. Kunz and A. Skowron, *Acta Crystallogr. B*, 1999, **55**, 698.
- 20 A. Salinas-Sanchez, J. L. Garcia-Munoz, J. Rodriguez-Carvajal, R. Saez-Puche and J. L. Martinez, *J. Solid State Chem.*, 1992, **100**, 201.
